# Supplementary material
Source: PubMed Central journal article supplement (PMC2386276)
Supplement: jcem_jc.2008-0038_1.pdf [file jcem_jc.2008-0038_1.pdf]

**Supplementary Table 1.** Associations of CAG biallelic mean with PCOS, restricted to pre-menopausal subjects

|                                    | PCOS  | Controls | Odds Ratio (95% CI) | P value <sup>a</sup> |
|------------------------------------|-------|----------|---------------------|----------------------|
| <b>Combined cohort (n=516)</b>     |       |          |                     |                      |
| Biallelic mean < median            | 50.2% | 41.5%    | 1.98 (1.25-3.13)    | 0.0038               |
| X-weighted biallelic mean < median | 54.3% | 46.7%    | 1.70 (1.08-2.68)    | 0.022                |
| <b>Whites (n=409)</b>              |       |          |                     |                      |
| Biallelic mean < 22                | 48.9% | 40.3%    | 1.66 (0.98-2.82)    | 0.059                |
| X-weighted biallelic mean < 22     | 55.1% | 46.6%    | 1.72 (1.02-2.91)    | 0.042                |
| <b>Blacks (n=101)</b>              |       |          |                     |                      |
| Biallelic mean < 20                | 59.5% | 44.1%    | 3.38 (1.21-9.42)    | 0.020                |
| X-weighted biallelic mean < 20     | 48.6% | 47.0%    | 1.45 (0.56-3.73)    | 0.44                 |

<sup>a</sup>P values from logistic regression. In all analyses, covariates included age and BMI. In the combined group, race was also taken as a covariate.
