# Supplementary material
Source: PubMed Central journal article supplement (PMC2386276)
Supplement: jcem_jc.2008-0038_2.pdf [file jcem_jc.2008-0038_2.pdf]

**Supplementary Table 2.** Relationship of X-inactivation to PCOS, restricted to pre-menopausal subjects

|                                                                        | <b>PCOS</b> | <b>Controls</b> | <b>Odds Ratio (95%<br/>CI)</b> | <b>P value<sup>a</sup></b> |
|------------------------------------------------------------------------|-------------|-----------------|--------------------------------|----------------------------|
| <b>Combined cohort</b>                                                 |             |                 |                                |                            |
| Non-random X-inactivation                                              | 57.6%       | 62.9%           | 0.66 (0.41-1.07)               | 0.092                      |
| Skewed X-inactivation                                                  | 12.6%       | 11.9%           | 1.14 (0.54-2.43)               | 0.73                       |
| Among subjects with non-random X-inactivation, active alleles < median | 54.3%       | 43.4%           | 1.89 (0.98-3.62)               | 0.056                      |
| <b>Whites</b>                                                          |             |                 |                                |                            |
| Non-random X-inactivation                                              | 58.7%       | 60.4%           | 0.72 (0.41-1.26)               | 0.25                       |
| Skewed X-inactivation                                                  | 12.6%       | 9.0%            | 1.63 (0.63-4.17)               | 0.31                       |
| Among subjects with non-random X-inactivation, active alleles < 22     | 54.8%       | 44.4%           | 1.73 (0.78-3.83)               | 0.18                       |
| <b>Blacks</b>                                                          |             |                 |                                |                            |
| Non-random X-inactivation                                              | 50.0%       | 68.3%           | 0.47 (0.17-1.28)               | 0.14                       |
| Skewed X-inactivation                                                  | 12.5%       | 18.3%           | 0.63 (0.15-2.63)               | 0.53                       |
| Among subjects with non-random X-inactivation, active alleles < 20     | 50.0%       | 41.5%           | 1.56 (0.44-5.50)               | 0.49                       |

<sup>a</sup> P values from logistic regression. In all analyses, covariates included age and BMI. In the combined group, race was also taken as a covariate.
